# Supplementary material for: Effects of restrictions to Income Support on health of lone mothers in the UK: a natural experiment study
Source: PubMed Central journal article supplement (PMC6038023; doi:10.1016/s2468-2667(18)30109-9), 2018-07-02

# THE LANCET

## Public Health

### **Supplementary appendix**

This appendix formed part of the original submission and has been peer reviewed. We post it as supplied by the authors.

Supplement to: Katikireddi SV, Molaodi OR, Gibson M, Dundas R, Craig P. Effects of restrictions to Income Support on health of lone mothers in the UK: a natural experiment study. *Lancet Public Health* 2018; **3**: e333–40.

## **Web Appendix**

### **Statistical analysis**

We fitted individual fixed effects linear regression models including an interaction term between follow-up and intervention group:

$$Y_{it} = \alpha_i + \beta_1 \text{Int}_i + \beta_2 \text{follow}_i + \beta_3 \text{Age}_i + \beta_4 \text{Kids}_i + \beta_5 \text{Education}_i + \beta_6 \text{follow}_i * \text{Int}_i + \varepsilon_{it}$$

where Y is the outcome, i refers to each participant and t each observation time-point; Int is a dummy variable indicating receipt of intervention; Age is the maternal age at baseline; Kids is number of children; Education is the highest educational attainment; follow is a dummy variable indicating observations taken post intervention; follow\*Int is the DiD estimator; and  $\varepsilon$  is the error term.

**Web Table 1: Detailed characteristics of study participants for total sample and complete cases**

|                                     | Total sample  |              | Complete cases |              |
|-------------------------------------|---------------|--------------|----------------|--------------|
|                                     | Baseline      | Follow-up    | Baseline       | Follow-up    |
| <b>Intervention 1 (7 to 5)</b>      | <b>N= 175</b> | <b>N=145</b> | <b>N=94</b>    | <b>N=94</b>  |
| Maternal age at baseline, Mean (SD) | 33.0 (6.9)    | 33.2(7.1)    | 33.6 (6.6)     | 34.7 (6.7)   |
| No of children (1), N (%)           | 75 (42.9)     | 61 (42.1)    | 40 (42.6)      | 38 (40.4)    |
| 2                                   | 64 (36.6)     | 54 (37.2)    | 36 (38.3)      | 35 (37.2)    |
| 3+                                  | 36 (20.6)     | 30 (20.7)    | 18 (19.2)      | 21 (22.3)    |
| Highest education (Low), N (%)      | 118 (75.2)    | 94 (72.3)    | 66 (70.2)      | 66 (70.2)    |
| Intermediate                        | 11 (7.0)      | 11 (8.5)     | 9 (9.6)        | 9 (9.6)      |
| High                                | 28 (17.8)     | 25 (19.2)    | 19 (20.2)      | 19 (20.2)    |
| SF 12 PCS, Mean (SD)                | 50.2 (11.3)   | 49.9 (11.0)  | 50.0 (10.8)    | 49.8 (10.0)  |
| SF 12 MCS, Mean (SD)                | 44.6 (12.0)   | 44.4(11.9)   | 43.5 (12.0)    | 41.1 (12.4)  |
| Self-rated health, Mean (SD)        | 2.8 (1.1)     | 2.8 (1.1)    | 2.8 (1.1)      | 3.0 (1.1)    |
| <b>Control 1</b>                    | <b>N= 328</b> | <b>N=293</b> | <b>N=187</b>   | <b>N=187</b> |
| Maternal age at baseline, Mean (SD) | 27.5 (6.9)    | 27.7 (6.9)   | 27.6 (6.9)     | 28.7 (6.8)   |
| No of children (1), N (%)           | 120 (36.6)    | 103 (35.2)   | 67 (35.8)      | 65 (34.8)    |
| 2                                   | 120 (36.6)    | 111 (37.9)   | 72 (38.5)      | 72 (38.5)    |
| 3+                                  | 88 (26.8)     | 79 (27.0)    | 48 (25.7)      | 50 (26.7)    |
| Highest education (Low), N (%)      | 219 (76.0)    | 192 (75.3)   | 134 (71.2)     | 134 (71.2)   |
| Intermediate                        | 23 (8.0)      | 20 (7.8)     | 17 (9.1)       | 17 (9.1)     |
| High                                | 46 (16.0)     | 43 (16.9)    | 36 (19.3)      | 36 (19.3)    |
| SF 12 PCS, Mean (SD)                | 52.02 (8.61)  | 51.9 (8.6)   | 51.8 (8.7)     | 51.6 (9.4)   |
| SF 12 MCS, Mean (SD)                | 45.46 (11.35) | 45.8 (11.2)  | 46.0 (10.2)    | 44.7 (11.6)  |
| Self-rated health, Mean (SD)        | 2.66 (0.98)   | 2.6 (0.98)   | 2.6 (0.98)     | 2.8 (1.1)    |
| <b>Control 2</b>                    | <b>N=944</b>  | <b>N=835</b> | <b>N=571</b>   | <b>N=571</b> |
| Maternal age at baseline, Mean (SD) | 40.2 (6.99)   | 40.2 (6.9)   | 40.1 (6.7)     | 41.2 (6.7)   |
| No of children (1), N (%)           | 555 (58.8)    | 489 (58.6)   | 331 (58.0)     | 367 (64.3)   |
| 2                                   | 304 (32.2)    | 273 (32.7)   | 192 (33.6)     | 165 (28.9)   |
| 3+                                  | 85 (9.00)     | 73 (8.7)     | 48 (8.4)       | 39 (6.8)     |
| Highest education (Low), N (%)      | 488 (58.4)    | 431 (58.4)   | 315 (55.2)     | 315 (55.2)   |
| Intermediate                        | 66 (7.9)      | 61 (8.3)     | 47 (8.2)       | 47 (8.2)     |
| High                                | 282 (33.7)    | 246 (33.3)   | 209 (36.6)     | 209 (36.6)   |
| SF 12 PCS, Mean (SD)                | 51.1 (10.6)   | 51.1 (10.6)  | 51.4 (10.4)    | 45.5 (11.6)  |
| SF 12 MCS, Mean (SD)                | 45.2 (11.7)   | 45.0 (11.7)  | 45.5 (11.6)    | 45.2 (11.5)  |
| Self-rated health, Mean (SD)        | 2.6 (1.1)     | 2.6 (1.1)    | 2.6 (1.1)      | 2.7 (1.1)    |

|                                     | Total sample |              | Complete cases |              |
|-------------------------------------|--------------|--------------|----------------|--------------|
|                                     | Baseline     | Follow-up    | Baseline       | Follow-up    |
| <b>Intervention 2 (10 to 7)</b>     | <b>N=192</b> | <b>N=146</b> | <b>N=83</b>    | <b>N=83</b>  |
| Maternal age at baseline, Mean (SD) | 35.4 (7.0)   | 35.1 (7.1)   | 35.2 (7.0)     | 36.2 (7.0)   |
| No of children (1), N (%)           | 75 (39.1)    | 53 (36.3)    | 32 (38.6)      | 30 (36.1)    |
| 2                                   | 83 (43.2)    | 65 (44.5)    | 35 (42.2)      | 37 (44.6)    |
| 3+                                  | 34 (17.7)    | 28 (19.2)    | 16 (19.3)      | 16 (19.3)    |
| Highest education (Low), N (%)      | 134 (75.7)   | 98 (74.8)    | 61 (73.5)      | 61 (73.5)    |
| Intermediate                        | 17 (9.6)     | 12 (9.2)     | 10 (12.1)      | 10 (12.1)    |
| High                                | 26 (14.7)    | 21 (16.0)    | 12 (14.5)      | 12 (14.5)    |
| SF 12 PCS, Mean (SD)                | 50.3 (10.3)  | 50.7 (9.8)   | 51.8 (9.2)     | 50.9 (10.9)  |
| SF 12 MCS, Mean (SD)                | 42.9 (12.5)  | 43.0 (12.3)  | 45.6 (11.2)    | 41.9 (14.9)  |
| Self-rated health, Mean (SD)        | 2.9 (.2)     | 2.9 (1.2)    | 2.9 (1.2)      | 2.8 (1.2)    |
| <b>Control 1</b>                    | <b>N=530</b> | <b>N=418</b> | <b>N=252</b>   | <b>N=252</b> |
| Maternal age at baseline, Mean (SD) | 28.6 (7.1)   | 28.8 (7.1)   | 29.1 (7.1)     | 30.1 (7.1)   |
| No of children (1), N (%)           | 188 (35.5)   | 154 (36.8)   | 90 (35.2)      | 84 (33.3)    |
| 2                                   | 211 (39.8)   | 164 (39.2)   | 96 (38.1)      | 105 (41.7)   |
| 3+                                  | 131 (24.7)   | 100 (23.4)   | 66 (26.2)      | 63 (25.0)    |
| Highest education (Low), N (%)      | 401 (81.3)   | 306 (79.5)   | 201 (79.8)     | 201 (79.8)   |
| Intermediate                        | 34 (6.9)     | 24 (6.2)     | 13 (5.2)       | 13 (5.2)     |
| High                                | 58 (11.8)    | 55 (14.3)    | 38 (15.1)      | 38 (15.1)    |
| SF 12 MCS, Mean (SD)                | 52.6 (9.2)   | 52.3 (9.0)   | 52.3 (9.3)     | 50.9 (9.4)   |
| SF 12 PCS, Mean (SD)                | 45.0 (11.9)  | 45.3 (11.7)  | 45.0 (12.2)    | 46.4 (11.0)  |
| Self-rated health, Mean (SD)        | 2.7 (1.0)    | 2.7 (1.0)    | 2.7 (1.0)      | 2.7 (1.0)    |
| <b>Control 2</b>                    | <b>N=623</b> | <b>N=522</b> | <b>N=284</b>   | <b>N=284</b> |
| Maternal age at baseline, Mean (SD) | 42.2 (6.0)   | 41.8 (6.0)   | 41.8 (5.9)     | 42.8 (5.9)   |
| No of children (1), N (%)           | 418 (67.1)   | 259 (61.7)   | 174 (61.3)     | 203 (71.5)   |
| 2                                   | 181 (29.5)   | 141 (33.6)   | 99 (34.9)      | 71 (25.0)    |
| 3+                                  | 24 (3.9)     | 20 (4.8)     | 11 (3.9)       | 10 (3.5)     |
| Highest education (Low), N (%)      | 328 (58.8)   | 198 (52.9)   | 136 (48.9)     | 136 (48.9)   |
| Intermediate                        | 59 (10.6)    | 44 (11.8)    | 35 (12.3)      | 35 (12.3)    |
| High                                | 171 (30.7)   | 132 (35.3)   | 113 (39.8)     | 113 (39.8)   |
| SF 12 PCS, Mean (SD)                | 49.6 (11.4)  | 49.9 (11.5)  | 50.2 (11.2)    | 50.0 (11.2)  |
| SF 12 MCS, Mean (SD)                | 45.8 (11.7)  | 45.9 (11.4)  | 46.5 (10.9)    | 46.2 (11.4)  |
| Self-rated health, Mean (SD)        | 2.8 (1.1)    | 2.8 (1.1)    | 2.8 (1.1)      | 2.8 (1.1)    |

**Web Table 2: Complete Case Analyses (with and without longitudinal weights)**

|                                 | Complete case analyses with no weights |              |         | Complete case analyses with longitudinal weights |              |         |
|---------------------------------|----------------------------------------|--------------|---------|--------------------------------------------------|--------------|---------|
|                                 | Effect size                            | 95% CI       | p value | Effect size                                      | 95% CI       | p value |
| <b>Intervention 1 (7 to 5)</b>  |                                        |              |         |                                                  |              |         |
| <i>Mental health</i>            |                                        |              |         |                                                  |              |         |
| Effect compared to CG 1         | -1.03                                  | -3.98, 1.92  | 0.491   | -0.31                                            | -3.97, 3.34  | 0.867   |
| Effect compared to CG 2         | -2.14                                  | -4.83, 0.55  | 0.119   | -1.37                                            | -4.70, 1.96  | 0.419   |
| <i>Physical health</i>          |                                        |              |         |                                                  |              |         |
| Effect compared to CG 1         | 0.06                                   | -2.37, 2.49  | 0.959   | -0.42                                            | -3.17, 2.32  | 0.763   |
| Effect compared to CG 2         | 0.16                                   | -1.94, 2.25  | 0.883   | 0.26                                             | -2.11, 2.62  | 0.831   |
| <i>Self-rated health</i>        |                                        |              |         |                                                  |              |         |
| Effect compared to CG 1         | 0.05                                   | -0.17, 0.28  | 0.635   | -0.04                                            | -0.31, 0.22  | 0.759   |
| Effect compared to CG 2         | 0.16                                   | -0.03, 0.36  | 0.102   | 0.18                                             | -0.05, 0.41  | 0.132   |
| <b>Intervention 2 (10 to 7)</b> |                                        |              |         |                                                  |              |         |
| <i>Mental health</i>            |                                        |              |         |                                                  |              |         |
| Effect compared to CG 1         | -5.11                                  | -8.49, -1.73 | 0.003   | -5.05                                            | -8.46, -1.63 | 0.004   |
| Effect compared to CG 2         | -3.75                                  | -7.02, -0.48 | 0.025   | -3.59                                            | -6.90, -0.28 | 0.034   |
| <i>Physical health</i>          |                                        |              |         |                                                  |              |         |
| Effect compared to CG 1         | 0.49                                   | -1.89, 2.88  | 0.685   | 0.21                                             | -2.11, 2.52  | 0.86    |
| Effect compared to CG 2         | -0.98                                  | -3.30, 1.35  | 0.409   | -1.21                                            | -3.42, 1.00  | 0.283   |
| <i>Self-rated health</i>        |                                        |              |         |                                                  |              |         |
| Effect compared to CG 1         | -0.05                                  | -0.28, 0.18  | 0.656   | 0.01                                             | -0.25, 0.28  | 0.927   |
| Effect compared to CG 2         | 0.04                                   | -0.18, 0.27  | 0.702   | 0.14                                             | -0.11, 0.39  | 0.279   |
| <b>Pooled effect</b>            |                                        |              |         |                                                  |              |         |
| <i>Mental health</i>            |                                        |              |         |                                                  |              |         |
| Effect compared to CG 1         | -2.61                                  | -4.98, -0.24 | 0.031   | -3.04                                            | -5.53, -0.56 | 0.017   |
| Effect compared to CG 2         | -2.81                                  | -4.89, -0.73 | 0.008   | -2.36                                            | -4.70, -0.02 | 0.048   |
| <i>Physical health</i>          |                                        |              |         |                                                  |              |         |
| Effect compared to CG 1         | 0.25                                   | -1.54, 2.03  | 0.787   | 0.01                                             | -1.75, 1.77  | 0.99    |
| Effect compared to CG 2         | -0.33                                  | -1.88, 1.22  | 0.677   | -0.45                                            | -2.07, 1.18  | 0.59    |
| <i>Self-rated health</i>        |                                        |              |         |                                                  |              |         |
| Effect compared to CG 1         | 0.017                                  | -0.15, 0.18  | 0.840   | 0.00                                             | -0.18, 0.19  | 0.968   |
| Effect compared to CG 2         | 0.147                                  | -0.01, 0.31  | 0.072   | 0.18                                             | -0.01, 0.37  | 0.06    |

**Web Table 3: Analyses of all single parents (including males), multiply imputed**

|                                 | <b>Effect size</b> | <b>95% CI</b> | <b>p value</b> |
|---------------------------------|--------------------|---------------|----------------|
| <b>Intervention 1 (7 to 5)</b>  |                    |               |                |
| <i>Mental health</i>            |                    |               |                |
| Effect compared to CG 1         | -1.58              | -4.21, 1.04   | 0.236          |
| Effect compared to CG 2         | -2.44              | -4.69, -0.19  | 0.034          |
| <i>Physical health</i>          |                    |               |                |
| Effect compared to CG 1         | 0.10               | -2.00, 2.21   | 0.922          |
| Effect compared to CG 2         | 0.36               | -1.38, 2.11   | 0.683          |
| <i>Self-rated health</i>        |                    |               |                |
| Effect compared to CG 1         | 0.04               | -0.18, 0.25   | 0.729          |
| Effect compared to CG 2         | 0.11               | -0.07, 0.29   | 0.233          |
| <b>Intervention 2 (10 to 7)</b> |                    |               |                |
| <i>Mental health</i>            |                    |               |                |
| Effect compared to CG 1         | -2.61              | -5.57, 0.36   | 0.085          |
| Effect compared to CG 2         | -1.40              | -4.05, 1.26   | 0.301          |
| <i>Physical health</i>          |                    |               |                |
| Effect compared to CG 1         | 0.82               | -1.56, 3.19   | 0.497          |
| Effect compared to CG 2         | -0.48              | -2.46, 1.51   | 0.638          |
| <i>Self-rated health</i>        |                    |               |                |
| Effect compared to CG 1         | 0.01               | -0.21, 0.23   | 0.921          |
| Effect compared to CG 2         | 0.09               | -0.12, 0.29   | 0.405          |
| <b>Pooled effect</b>            |                    |               |                |
| <i>Mental health</i>            |                    |               |                |
| Effect compared to CG 1         | -2.32              | -4.31, -0.32  | 0.023          |
| Effect compared to CG 2         | -2.31              | -4.17, -0.45  | 0.015          |
| <i>Physical health</i>          |                    |               |                |
| Effect compared to CG 1         | 0.59               | -1.05, 2.22   | 0.479          |
| Effect compared to CG 2         | -0.01              | -1.47, 1.44   | 0.987          |
| <i>Self-rated health</i>        |                    |               |                |
| Effect compared to CG 1         | 0.03               | -0.12, 0.18   | 0.706          |
| Effect compared to CG 2         | 0.12               | -0.02, 0.25   | 0.103          |

**Web Table 4: Difference-in-difference estimates of the impact of lone parent obligations on mental, physical and self-rated health: intervention groups 1 and 2 compared to control group 1 (excluding parents whose youngest child was less than one year old), multiply imputed**

|                                 | Effect size | 95% CI       | p value |
|---------------------------------|-------------|--------------|---------|
| <b>Intervention 1 (7 to 5)</b>  |             |              |         |
| <i>Mental health</i>            | -1.87       | -4.63, 0.89  | 0.183   |
| <i>Physical health</i>          | 0.39        | -1.88, 2.67  | 0.733   |
| <i>Self-rated health</i>        | 0.05        | -0.19, 0.28  | 0.700   |
| <b>Intervention 2 (10 to 7)</b> |             |              |         |
| <i>Mental health</i>            | -2.45       | -5.52, 0.62  | 0.117   |
| <i>Physical health</i>          | 0.65        | -1.79, 3.09  | 0.601   |
| <i>Self-rated health</i>        | 0.06        | -0.17, 0.28  | 0.617   |
| <b>Pooled Effect</b>            |             |              |         |
| <i>Mental health</i>            | -2.34       | -4.43, -0.26 | 0.028   |
| <i>Physical health</i>          | 0.60        | -1.10, 2.29  | 0.488   |
| <i>Self-rated health</i>        | 0.06        | -0.10, 0.22  | 0.460   |

**Web Table 5: Difference-in-differences models for maternal demographic characteristics (pooled analysis), complete case analysis**

|                                 | Odds ratio | 95% CI       | p value |
|---------------------------------|------------|--------------|---------|
| <b>Control 1</b>                |            |              |         |
| Maternal Age                    | -0.057*    | -0.26, 1.49  | 0.588   |
| Intermediate (vs low education) | 1.011      | 0.96, 1.06   | 0.660   |
| Tertiary (vs low education)     | 1.00       | 0.97, 1.04   | 0.774   |
| <b>Control 2</b>                |            |              |         |
| Maternal Age                    | 0.019*     | -0.082, 0.12 | 0.647   |
| Intermediate (vs low education) | 0.963      | 0.92, 1.01   | 0.136   |
| Tertiary (vs low education)     | 0.991      | 0.95, 1.03   | 0.649   |

\*Effect size

**Web Table 6: Difference-in-difference estimates of the impact of lone parent obligations on mental, physical and self-rated health (pooled analysis), multiply imputed**

|                                     | Model 1 | 95% CI       | p value | Model 2 | 95% CI       | p value |
|-------------------------------------|---------|--------------|---------|---------|--------------|---------|
| <i>Mental health</i>                |         |              |         |         |              |         |
| Effect compared to control group 2* | -2.33   | -4.33, -0.33 | 0.022   | -2.43   | -4.50, -0.36 | 0.022   |
| <i>Physical health</i>              |         |              |         |         |              |         |
| Effect compared to control group 2* | 0.079   | -1.45, 1.61  | 0.568   | -0.053  | -1.66, 1.56  | 0.949   |
| <i>Self-rated health</i>            |         |              |         |         |              |         |
| Effect compared to control group 2* | 0.12    | -0.026, 0.27 | 0.105   | 0.15    | -0.008, 0.30 | 0.063   |

\*Restricted to mothers whose youngest child was aged 7-9 years (intervention 1) and 10-12 years (intervention 2). Model 1 unadjusted and Model 2 adjusted for maternal age, education and number of children.

**Web Table 7: Difference-in-difference estimates of the impact of lone parent obligations on mental, physical and self-rated health using dummies for maternal age (20-29, 30+) and age of youngest child (1, 2, 3+) (pooled analysis), multiply imputed**

|                                    | Effect size | 95% CI       | p value |
|------------------------------------|-------------|--------------|---------|
| <i>Mental health</i>               |             |              |         |
| Effect compared to control group 1 | -2.18       | -4.23, -0.14 | 0.036   |
| Effect compared to control group 2 | -2.23       | -4.15, 0.31  | 0.023   |
| <i>Physical health</i>             |             |              |         |
| Effect compared to control group 1 | 0.38        | -1.28, 2.04  | 0.65    |
| Effect compared to control group 2 | -0.16       | -1.64, 1.38  | 0.837   |
| <i>Self-rated health</i>           |             |              |         |
| Effect compared to control group 1 | 0.048       | -0.11, 0.20  | 0.54    |
| Effect compared to control group 2 | 0.13        | -0.011, 0.27 | 0.072   |



**Web Table 8: Difference-in-difference estimates of the impact of lone parent obligations on inequalities in mental, physical and self-rated health effect by educational attainment. Model adjusted for maternal age and number of children, (pooled analysis), multiply imputed**

|                                    | <b>Effect size</b> | <b>95% CI</b> | <b>p value</b> |
|------------------------------------|--------------------|---------------|----------------|
| <i>Mental health</i>               |                    |               |                |
| Effect compared to control group 1 | 1.59               | -3.23, 6.42   | 0.516          |
| Effect compared to control group 2 | 1.80               | -2.66, 6.25   | 0.429          |
| <i>Physical health</i>             |                    |               |                |
| Effect compared to control group 1 | -2.37              | -5.77, 1.02   | 0.170          |
| Effect compared to control group 2 | -2.92              | -6.18, 0.33   | 0.078          |
| <i>Self-rated health</i>           |                    |               |                |
| Effect compared to control group 1 | 0.22               | -0.14, 0.58   | 0.228          |
| Effect compared to control group 2 | 0.38               | 0.058, 0.70   | 0.021          |

Web Figure 1: Mean SF12 mental component scores for intervention group 1 and control groups 1 and 2 and 2

(a) Complete cases

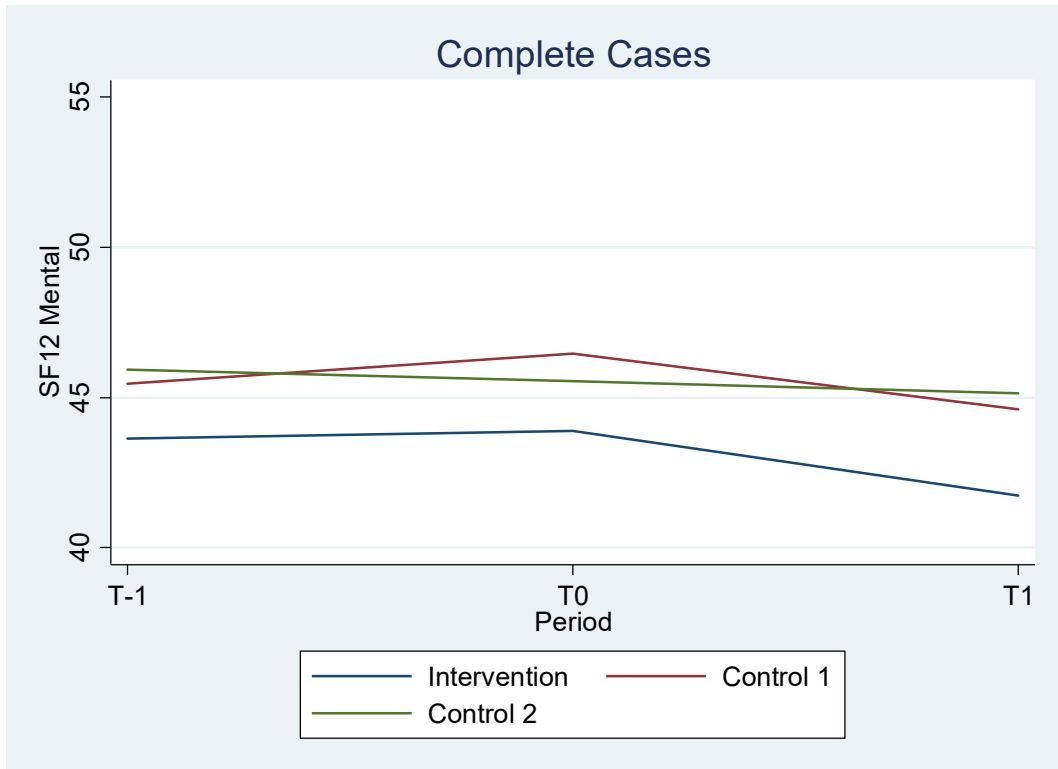

(b) All cases

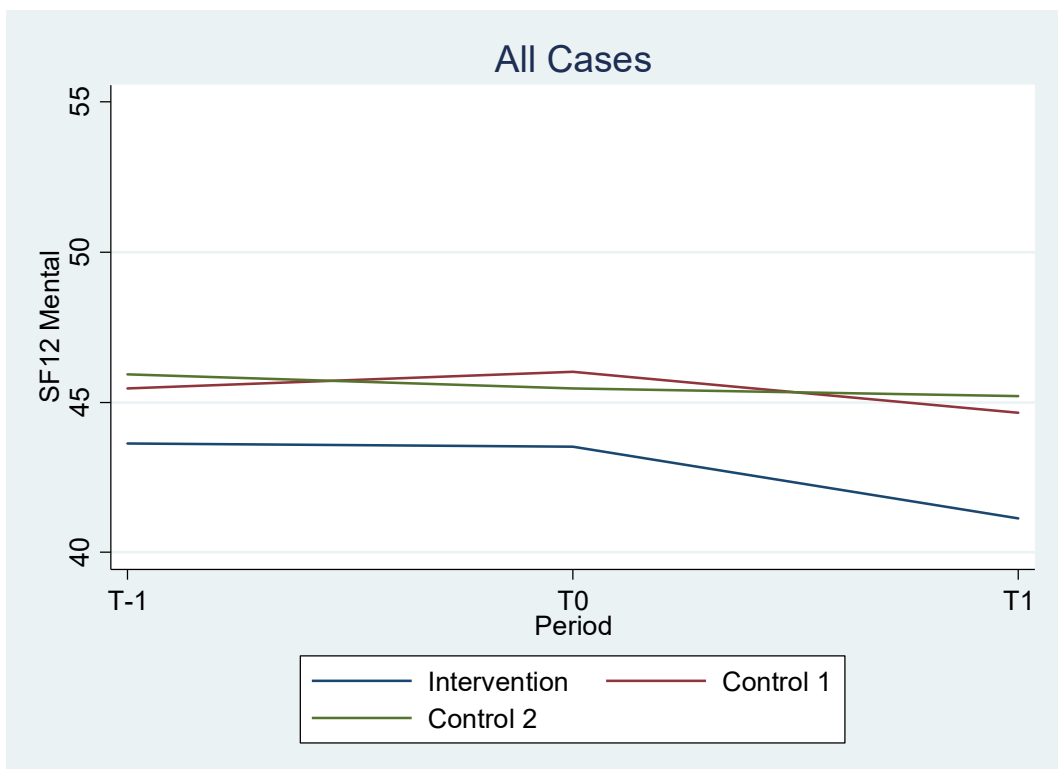

Web Figure 2: Mean SF12 physical component scores for intervention group 1 and control groups 1 and 2

(a) Complete cases

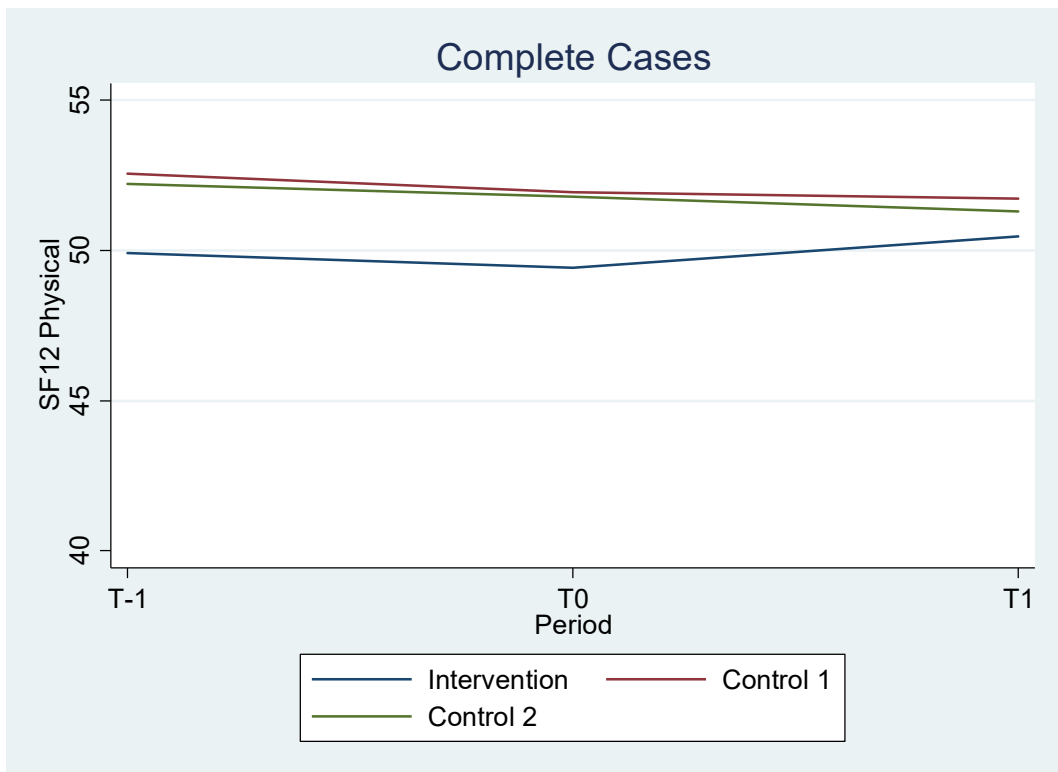

(b) All cases

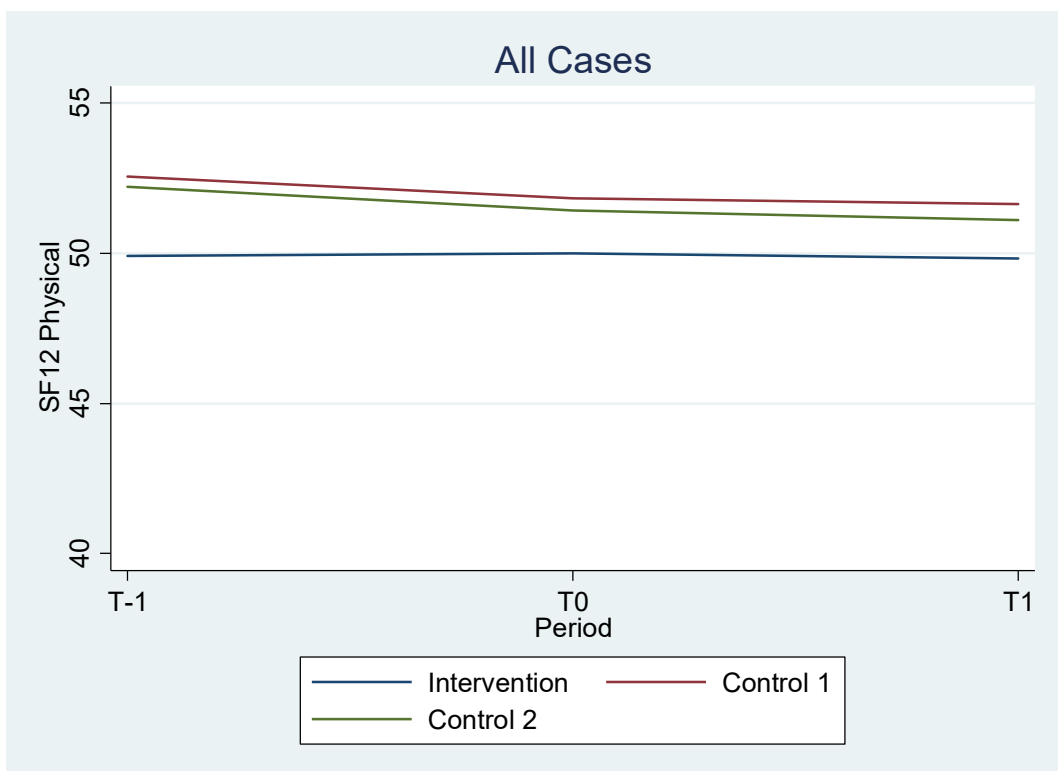

Supplement: mmc1.pdf [file mmc1.pdf]
